1  
2  
3  
4  
5  
6  
7  
8  
9  
10  
11  
12  
13  
14  
15  
16  
17  
18  
19  
20  
21  
22  
23  
24  
25  
26  
27

BIOLOGICAL SCIENCES: Agricultural Sciences

Loss of Photosynthetic Rhythm Thermal Plasticity Under Domestication and Repurposing Drivers of Circadian Clock (DOC) Loci for Adaptive Breeding in Barley

*Short title:* Repurposing Clock Plasticity Under Domestication

Manas R. Prusty<sup>\*,a</sup>, Eyal Bdolach<sup>\*,a</sup>, Eiji Yamamoto<sup>\*,b</sup>, Jeffrey L. Neyhart<sup>c</sup>, Lalit D. Tiwari<sup>a</sup>, Klaus Pillen<sup>d</sup>, Adi Doron-Feigenbaum<sup>a</sup>, Kevin P. Smith<sup>c</sup>, and Eyal Fridman<sup>a,1</sup>

<sup>a</sup> Institute of Plant Sciences, Agricultural Research Organization (ARO), The Volcani Center, P. O. Box 6, 5025001, Bet Dagan, Israel

<sup>b</sup> Department of Life Sciences Faculty of Agriculture, Meiji University, Japan

<sup>c</sup> Department of Agronomy and Plant Genetics, University of Minnesota, St. Paul, MN 55108

<sup>d</sup> Institute of Agricultural and Nutritional Sciences, Martin-Luther University Halle-Wittenberg, Halle (Saale), Germany

\* These authors equally contributed to this manuscript.

Author for correspondence:

Eyal Fridman

E-mail: [fridmane@agri.gov.il](mailto:fridmane@agri.gov.il), Tel: +972-3-9683901

**Keywords:** Circadian clock; Domestication; Plasticity; Barley; Genome-wide association studies ; Crop yield; QTL-environment association; Local adaptation

28

## 29 **Abstract**

30 Circadian clock rhythms are critical to control physiological and development traits,  
31 allowing, plants to adapt to changing environments. Here we show that the circadian rhythms  
32 of cultivated barley (*Hordeum vulgare*) have slowed and amplitude increased under  
33 domestication by comparing with its wild ancestor (*H. spontaneum*). Moreover, we show a  
34 significant loss of thermal plasticity during barley evolution for the period and more  
35 extensively for amplitude. Our genetic analysis indicates that wild allele at epistatic loci,  
36 which mutually condition clock variation and its thermal plasticity in interspecific crosses,  
37 are absent in a contemporary barley breeding panel. These epistatic interactions include  
38 conditioned effects of Drivers of Circadian (DOC) clock loci on chromosome 3 and 5, which  
39 mediate amplitude decrease and period lengthening, respectively, under domestication.  
40 Notably, two significant loci, *DOC3.1* and *DOC5.1*, which are not associated with clock  
41 diversity in cultivated breeding material, do show pleiotropic effects on flowering time and  
42 grain yield at multiple experimental sites across the U.S. in a temperature-dependent manner.  
43 We suggest that transition from winter growth of wild barley (*H. spontaneum*) to spring  
44 growth of modern cultivars included the loss and repurposing of circadian clock regulators to  
45 yield adaptation by mechanisms yet to be clarified.

46

## 47 **Significance statement**

48 Circadian clock rhythms are crucial factors affecting crop adaptation to changing  
49 environments. If faced with increased temperature plants could respond with temperature  
50 compensation adaptation and maintain clock rhythms, or they can change period and/or  
51 amplitude to adapt. We used a combination of approaches: high-throughput clock analysis  
52 under optimal and elevated heat conditions, genome-wide association study (GWAS) with  
53 cultivated and wild diversity panels to identify changes under domestication and quantitative  
54 trait loci (QTL) that control the clock and its responses, and QTL-environment association  
55 for testing environmentally-conditioned effects of these QTL on grain yield and flowering  
56 timing across US. Our findings provide insights into changes of circadian rhythms under  
57 domestication and genetic tools for plant breeders to develop better-adapted cultivars to  
58 changing environments.

## 59 **Introduction**

60 Growth and metabolism are following rhythms that allow a resonance between  
61 environment dynamics, e.g. day and night, and molecular pathways that regulate these  
62 biological activities. The core circadian clock is what drives these rhythms, and it is  
63 reflecting on the cyclic pattern of different layers or outputs such as photosynthesis, cell  
64 division, and metabolism, e.g. starch synthesis and degradation. One hallmark attribute of the  
65 circadian clock machinery is that it maintains a relatively stable cycle of about (circa) 24  
66 hours (dies)(1). Nevertheless, one emerging question in the study of the circadian clock is to  
67 what extent is it robust to environmental changes and does plasticity rather than such  
68 robustness or temperature compensation has been selected during natural or artificial  
69 evolution, i.e. crop domestication. The change in characteristics of the circadian clock has a  
70 major influence on the growth of plants and synchronization with the diurnal cycle is  
71 considered a critical adaptive feature of the clock (2, 3). Nevertheless, few studies have  
72 utilized naturally occurring variation (4), or made a systematic comparison between wild and  
73 cultivated plant material to realize if buffering or flexibility of the circadian clock against  
74 increased temperature is more beneficial at the population level. Alternatively, it is not clear  
75 yet if selection under domestication and breeding worked against or for plasticity of the  
76 clock, and if so, to what characteristic of the clock (period or amplitude, or both)?

77 The core clock in plants composed of three interlocked feedback loops, in which two  
78 Myb domain transcription, CIRCADIAN AND CLOCK ASSOCIATED1 (CCA1) and LATE  
79 ELONGATED HYPOCOTYL (LHY), are the hubs in these loops. The day-time expression  
80 of CCA1 acts to suppress expression in two loops, of TOC1 gene and of the evening complex  
81 including ELF4, LUX, GI and ELF3, which in turn work to suppress CCA1 and LHY during  
82 the night. In parallel, LHY and CCA1 protein complex are promoting the expression of a  
83 family of pseudo-response regulator (PRR) gene family, which in turn close the third loop  
84 and suppress LHY and CCA1 to facilitate the day-night cyclic expression of the core clock  
85 genes (1). Besides these three interlocked feedbacks loops, the core clock includes additional  
86 genes that affect the clock by posttranslational modifications and stabilization of its core  
87 components, dependent and independent of the light quality and quantity. The F-box protein  
88 ZEITLUPE (ZTL) and clock element GIGANTEA (GI) heterodimerize in the cytosol and  
89 hold the later from entering the nucleus and promote flowering (5). Notably, such  
90 modifications are rhythmic and also act on gene products in physiological, metabolic and  
91 signaling pathways (6), which consider as outputs of the core circadian clock machinery.  
92 Photosynthetic activity is one such output that became relevant for the development of non-

93 invasive high throughput measurement of the circadian clock. These remote methods are  
94 including prompt and delayed fluorescence (F and DF) from Chl(7–9).

95 Transcript and protein abundance of circadian rhythms have been observed in barley  
96 plants as well (10–13). Several studies have reported the diurnal and circadian expression for  
97 HvLHY (HvCCA1), HvPPD-H1, HvPRR73, HvPRR59, HvPRR95, HvGI, HvTOC1,  
98 HvLUX and HvELF3(14–19). By mutant analysis, three barley clock genes have been well  
99 characterized: Ppd-H1, ELF3 and LUX (15, 18–20). The two early maturity mutants, early  
100 maturity 8 (*eam8*) and *eam10* barley genes were homologs of the Arabidopsis clock genes  
101 ELF3 and LUX1, respectively and mutants plants of both genes showed photoperiod  
102 insensitivity and early flowering under long- and short-day conditions in barley (18–20).  
103 More recently, analysis of diel and circadian leaf transcriptomes in the cultivar Bowman and  
104 derived introgression lines harboring mutations in EARLY FLOWERING 3 (ELF3), LUX  
105 ARRHYTHMO 1 (LUX1), and EARLY MATURITY 7 (EAM7) allowed Muller et al. (21)  
106 to predict the structure of the barley circadian oscillator and interactions of its components  
107 with day-night cues. In fact, some of the critical phenotypes under crop domestication were  
108 linked with mutations in the circadian clock genetic network and connected between clock  
109 variation to life-history traits relevant for adaptation to agricultural set-up and changing  
110 relevant traits (see detailed review (22). In wheat, barley and sorghum PRR-mediated  
111 insensitivity to long days was crucial for the transition to the Northern hemisphere, yet it was  
112 not implicated in life cycle control but more in the regulation of photoperiod flowering (15,  
113 23). At the same time, selection for other clock gene alleles, e.g. *eam8* mutated at the barley  
114 HvElf3, which disrupt the dependency of flowering by time-of-the-day light inputs, allowed  
115 cultivation further north from the Fertile Crescent, in the shorter growing season of Europe  
116 (19). Signature of selection under domestication for clock traits and genes underlying were  
117 also reported recently for tomato, in which mutations in *LNK2* and *EIDI*, both involved in  
118 light input to the circadian clock, were favored in the cultivated varieties (24).

119 In this study, we utilized our developed SensyPAM high-throughput F-based  
120 circadian rhythm measurement platform to estimate and compare the rhythmicity of the  
121 clock. We performed this phenotypic analysis on three barley populations with varying  
122 proportions of wild vs cultivated allelic diversity. We performed a genome scan, including  
123 single and two-dimensional GWAS to describe Drivers of clock (DOC) loci underlying the  
124 changes in circadian clock characteristics (their plasticity) between optimal and high  
125 temperature environments. Our analysis indicates the significant changes in rhythmicity  
126 including period and amplitude, as well as loss of plasticity between the two environments,

127 has occurred under domestication. Furthermore, comparison between genomic architectures  
128 underlying clock variation in wild and cultivated populations point to the loss of alleles at  
129 specific loci for clock deceleration and for its thermal plasticity. Finally, a QTL–climate  
130 association analysis between DOC loci and field phenotype across US indicate the  
131 repurposing of plasticity clock QTL for determining grain yield and heading variation thus  
132 revealing their potential for adaptive breeding.

133

## 134 **Results**

135 *Hordeum vulgare* populations with reduced levels of wild *H. spontaneum* DNA diversity show  
136 clock deceleration, increased amplitude and reduced thermal plasticity

137 Our initial goal was to compare populations with varying proportions of wild vs cultivated  
138 alleles for their thermal circadian clock plasticity. To estimate the rhythms of the clock we  
139 used the high throughput F analysis of plants at the 3-4 leaf stage, after these were entrained  
140 under long days or short days (14 h of light and 10h of dark and vice versa; see Methods).

141 We estimated the period and amplitude of the clock rhythms from non-photochemical  
142 quenching (NPQ) levels measured under continuous light for 3 days. These experiments were  
143 conducted under optimal temperature (OT; 22°C) and high temperature (HT; 32°C), which  
144 allowed us to calculate the period and amplitude thermal plasticity, i.e. the change of the  
145 mean value of the trait for each line between the two environments (HT-OT).

146 Previously we used this SensyPAM platform to extract these clock parameters from a  
147 biparental wild barley doubled haploid population (8) however, since we wished to obtain a  
148 better representation of the wild gene pool we expanded our analysis. We included  
149 representative accessions that were collected in each of the micro-sites of the wild barley  
150 infrastructure, Barley1K (B1K), and encompassed all the 51 sites that represent a broad  
151 genetic and ecogeographic adaptation (25). On average, the period of the B1K accessions was  
152 shortened under HT (HT-OT) by -1.6 hr (Fig. 1a). Nevertheless, there was a varying level of  
153 responses to heat between accessions, from relatively robust accessions such as Mt Eitan  
154 (B1K-49 site; mean delta of period (dPeriod) of 0.39 h±1.0) to highly plastic ones as Talkid  
155 stream (B1K-08 site ; dPeriod of -4.73 h±1.2) (Table S1). Changes in the amplitude of the  
156 clock were even more dramatic between the two environments with mean values doubled  
157 under HT compared to OT (Fig. 1b; Table S1). As with period, the plasticity in the amplitude  
158 also varied between increases of 10% (B1K-37) to more than 400% (B1K-44; Table S1); yet  
159 overall there was no overlap between amplitude levels under two environments. Notably, this

160 clock plasticity results are very much alike to those we observed for the bi-parental wild  
161 barley doubled haploid population (8).

162 Next, we analyzed the interspecific multiparent barley population HEB-25 that  
163 includes 25 wild barley donor accessions into the background of the cultivar Barke (26). In  
164 this population, each of the lines is theoretically homozygous for the cultivated genome at  
165 71.875% of the sites (26), as compared to none such cultivated diversity in the B1K.  
166 Nevertheless, each HEB family is derived from a different *H. spontaneum* accession that  
167 originate from the wide barley distribution range including Tibet, Fertile Crescent, and  
168 Southern Levant (26). Thermal plasticity of the clock period was similar in direction to that  
169 found in the B1K, i.e. a mean dPeriod of  $-1.52 \pm 2.53$ ; Fig. 1a; Table S1). However, we  
170 observed a much less significant difference in the changes of the clock amplitude between the  
171 HEB and B1K collections (Fig. 1b); while the dAmplitude in B1K averaged at +142.6%, that  
172 in the HEB lines was half of that (dAmplitude= +72.3%). Since the HEB population is  
173 composed of 25 sub-population we partitioned these comparisons to each of the families.  
174 This analysis showed that, as between the B1K sites, there was a spectrum of responses  
175 between the families with different HID (*H. spontaneum* accessions) donor (Supplementary  
176 Fig. S1). For example, while the dAmplitude in the HEB-02 (wild donor is HID004; (26))  
177 population was on average +180%, that of lines derived from of HEB-14 (HID144) was  
178 almost unchanged (dAmplitude=-4.2%; Supplementary Fig. S1 and S2).

179 Finally, we analyzed the circadian clock responses of elite barley breeding material for the  
180 same environmental changes. The US Spring Two-Row Multi-Environment Trial (S2MET)  
181 panel is including 232 breeding lines (27), and to the best of our knowledge there was no wild  
182 barley material included in its development. A clear difference between the wild and  
183 cultivated plant material is the deceleration of the rhythm and increase in the amplitude under  
184 optimal temperature in the cultivated barley (Fig. 1a and 1b). While the mean of the wild B1K  
185 accessions under OT averaged at 25.5 hr, ranging between 21.04 and 33.1 hr (Table S1), that  
186 of the US panel showed a decelerated pace with an average period of 26.1hr under OT. The  
187 amplitude of the cultivated material was significantly higher than the wild accessions,  
188 showing on average increase of 131% (Table S1; Fig. 1b). These results show clearly that  
189 under domestication, as observed for tomato (28), the circadian clock has decelerated, and  
190 moreover, under optimal conditions the amplitude has significantly increased. Moreover,  
191 unlike the clear plasticity observed in the fully wild (B1K) and interspecific (HEB)  
192 populations (Student's t-test;  $P < 0.0001$  different than zero), the mean plasticity of the *H.*  
193 *vulgare* S2MET lines was not significantly different than zero for period (Student's t-test; P

194 =0.1) and small difference observed for amplitude (Student's t-test;  $P=0.01$ ). These  
195 differences between the three gene pools are clearly viewed in the reaction norms between  
196 OT and HT (Fig. 1a and 1b). Moreover, analysis for the interactions between the gene pools  
197 and the environments support these significant differential responses (ANOVA test;  
198  $P<0.0001$ ) between cultivated, semi-cultivated and wild gene pools (Table S2).

199

### 200 *Genome wide association study(GWAS) identify genetic network between Drivers of Clock* 201 *(DOC) loci in interspecific population*

202 To identify wild alleles that contribute to these changes in pace and plasticity of the clock  
203 between wild and cultivated gene pools we performed a genome scan using clock phenotypes  
204 and SNP data available for the HEB-25 population (29). Because the choice of the method  
205 used to map the trait plasticity has significant consequence on the results (30), we used the  
206 circadian clock phenotype dataset to specify these loci by using three different genetic  
207 models (see Methods). Our assumption is that signals that will be repeated in two of the three  
208 methods (LMM, MLM and EBL) methods are more reliable and deserve follow-up analysis.  
209 We also added to the single point analysis a two-dimensional genome scan to capture  
210 possible di-genic epistatic interactions underlying the plasticity.

211 After filtering the SNP data, based on maximum missing genotypes per marker of  
212 25%, and minor allele frequency above 3%, we continued the analysis with 3,013 loci (Table  
213 S3). Genome scan for the loci affecting trait per-se (under OT or HT), or their plasticity  
214 (delta of trait), was initially conducted with a linear mixed model (LMM), which took into  
215 consideration the population structure and HEB familial relationships (see Methods). By  
216 using a significant threshold determined by Bonferroni correction or BH FDR 0.1 we  
217 identified only three significant QTL. One, which we named Driver of Clock 3.1(*DOC3.1*),  
218 resides on chromosome 3 (position 29,085,440 -36,987,723; PVE= 4.5 %) and was  
219 associated with variation of the amplitude only under HT(Fig. 2a; Table S4a and S4b).  
220 Another significant QTL loci, *DOC3.2* (43,840,769-51,509,488) resides on chromosome 3  
221 nearby to the *DOC3.1* and the most significant loci in this region is BOPA2\_12\_31475  
222 (position, 51,509,488, LOD = 4.63; PVE= 4.5 %). Notably, the increase in the amplitude  
223 under HT for both *DOC3.1* and 3.2 loci was attributed due to the effect of the wild allele for  
224 all the markers in these loci (Table S4b, S4c). The third QTL loci named as *DOC5.1*, resides  
225 on chromosome 5 (position 605,805,151-608,879,935; and was associated with variation of  
226 the period only under OT and the significant marker associated is  
227 SCRI\_RS\_196175(607,080,381, LOD = 4.94 &PVE= 9.8%)(Fig. 2b; Tables S4a and S4b).

228 Also, the shortening of the period by this locus is associated to the wild allele effect for all the  
229 markers in this region (Table S4b, S4c). Figure 2c and 2d depict the marker effects of  
230 *DOC3.1* and *DOC5.1* on amplitude and period plasticity. While *DOC3.1* is inherited with  
231 dominance to the cultivated allele (Fig. 2c), *DOC5.1* seemed to be inherited with dominance  
232 to the wild allele (Fig. 2d). It is important to note that only the *DOC3.1*, *DOC3.2* & *DOC5.1*  
233 consistently appeared in three of the methods of GWAS i.e LMM, EBL and MLM  
234 (Supplementary figure S3). Apart from these, other DOCs appear for the HEB panel such as  
235 *DOC5.2* and *DOC6.1* (Table S4), however they are the results from the Tassel MLM model  
236 only with a permissive p-values.

237

238 Next, we wished to expand our analysis and look for possible epistatic interactions  
239 that may explain the two type of changes in the clock (deceleration under domestication and  
240 thermal plasticity). We performed a two-dimensional (2D) GWAS with the results obtained  
241 with the HEB population under OT and HT (see Methods). Table S5 summarizes all the  
242 significant di-genic interaction that we identified for the different clock traits. Some of the  
243 loci that played a role in these interactions were not found in the previous 1D GWAS. We  
244 noticed that the interactions between the loci appearing with high additive values are mostly  
245 heat-conditioned and act on clock amplitude (Table S5; Fig. 2a; Supplementary Fig. S4). At  
246 the same time, conditioning is also found across period (Supplementary Fig. S5) and  
247 amplitude, where each member of an interacting pair condition a different trait for the other.  
248 For clock amplitude under HT we identified two major interactions between *DOC3.1* or  
249 *DOC3.2*, which we identified in 1D analysis, with newly identified loci at of chromosome 5  
250 (Table S5). Figure 3 depicts these interactions for both *DOC3.1* and *DOC3.2* with the same  
251 locus on chromosome 5. While the interactions of *DOC3.2* were more significant for  
252 amplitude and under HT only (Fig. 3a and 3b), those of *DOC3.1* acted reciprocally between  
253 the chromosome 3 and 5 on both amplitude and period (Fig. 3c and 3d). This HT-dependent  
254 interaction showed that the modulation of clock by *DOC3.1* is conditioned by the allelic  
255 combination in chromosome 5 and vice versa. The increase of the amplitude between  
256 homozygous for wild and cultivated allele at *DOC3.1* (*DOC3.1*<sup>Hs/Hs</sup> vs *DOC3.1*<sup>Hv/Hv</sup>) is  
257 conditioned by homozygosity for the wild at the chromosome 5 locus (Fig. 3c). Similarly, but  
258 this time for the period, the acceleration of the clock by the chromosome 5 QTL is  
259 conditioned by homozygosity at the *DOC3.1* (Fig. 3d). To summarize, these clear digenic  
260 interaction (with one locus not identified in 1D GWAS) provides amplitude and period  
261 plasticity only for the carriers of the wild alleles at both loci.



262

263 *GWAS for clock diversity in breeding material highlight differential genetic network and lack*  
264 *of epistatic interactions*

265 To unravel the genetic network underlying variation in the clock phenotypes, including that  
266 underlying thermal plasticity, we repeated the two types of GWAS, i.e. single point and di-  
267 genic (1D and 2D), for the S2MET breeding panel using the SensyPAM data we obtained  
268 under OT and HT (Table S1). Overall, this genomic architecture included a different set of  
269 significant QTL that we associated with clock period, amplitude and their thermal plasticity  
270 (Fig. 4). Interestingly, for this breeding panel we did not find any QTL that came consistent  
271 with the different models we used. From Tassel MLM, we identified one locus underlying  
272 amplitude variation on the telomeric end of chromosome 3 on the, i.e. *DOC3.4*, explaining  
273 13.9% and 12.5 % of the amplitude plasticity (delta Amplitude) and its variation under OT,  
274 respectively (Fig. 4a, Table S4; see Methods). The most notable locus associated with  
275 variation in amplitude of the clock, *DOC7.2b*, explained 14% of the variation for the trait  
276 under optimal thermal condition. Finally, we associated one additional QTL, *DOC2.2b*,  
277 affecting variation under high temperature on chromosome on chromosome 2. We noticed  
278 that loci underlying the period variation, as these affecting amplitudes, in this US panel had  
279 higher contribution to the variation. This included *DOC3.3* that explained 10.7% of general  
280 period variation under HT, and *DOC2.3* and *DOC5.3* with PVE=8.3% and 8.7%, each is  
281 higher from any locus in the HEB population (Table S4).

282 In addition to the interspecific and cultivated populations identifying a different set of  
283 DOC QTL (Fig. 2 vs Fig 4; Table S4), the cultivated population exhibited a lack of significant  
284 epistatic interactions was, under both temperatures. In any method taken (see Methods) we  
285 could not identify in the breeding panel significant di-genic interactions for any of the clock  
286 traits (Supplementary Fig. S6 and S7). This is compared to ample amount of significant  
287 interactions found for trait per se (amplitude and period) and their plasticity (dAmplitude and  
288 dPeriod) in the HEB population (Table S5; Fig. 2).

289

290 *The *DOC3.1* and *DOC5.1* are significantly associated with temperature-dependent effects on*  
291 *heading and grain yield*

292 Since we observed a significant loss of plasticity from the wild to the cultivated gene  
293 pool and no overlap in loci detected for clock variation between the two populations, we were  
294 curious to test if some of the DOC loci identified in HEB population could be associated with  
295 other traits in cultivated barley.. The S2MET panel was phenotyped for 14 important traits in

296 39 location-year environments between 2015 and 2017 (27). This allowed us to perform per-  
297 trial GWAS for two main fitness traits, i.e. heading date (HEA) and grain yield (GY), using  
298 the 5068 high-quantity filtered SNPs (Table S3 and S6). Then, we compared the  
299 chromosomal location of the DOC loci identified in the HEB or US panel and checked for  
300 co-localization of clock and agronomic trait QTLs. Notably, in these GWAS analyses, SNP  
301 associated with heading date were much more consistent across the 39 environments  
302 compared with those associated with grain yield implying heading time QTL are more stable  
303 than yield. For example, marker S2\_429692133 on chromosome 2 (physical position  
304 429,692,133) appeared to be significantly linked ( $LOD > 3$ ) with heading date in 16 out of 39  
305 (41.02 %) field trials (Table S6). Other heading date markers, that were reproducible across  
306 different sites ranged from two to twelve environments whereas the upper limit for yield was  
307 (7.6%). To represent the frequency of such stable SNP across different sites, we considered  
308 the number of significant SNP and generated a density plot for GY and HEA (Fig. 5a and 5b).  
309 In that regard, *DOC3.1* and *DOC5.1* belongs to be more as relatively stable loci for GY, i.e.  
310 we identified *DOC3.1* significant effects on GY in up to 3 experimental trials (7%), and for  
311 *DOC5.1*, the effect was repeated up to 2 trials depending on the markers we used in the  
312 genetic analysis (5.1%; Fig. 5a, Table S7). We could also observe that *DOC5.1*, unlike  
313 *DOC3.1*, was also having relatively consistent effect on HEA up to 3 trials (7%) for markers  
314 used in the interval (Fig. 5b, Table S6).

315 Moreover, we wished to take a more quantitative approach and examine if the relative  
316 level of genetic association, i.e. its significance, with GY and HEA are conditioned by the  
317 environmental variation, therefore suggesting that they are involved in local adaptation. To  
318 test the possible relationship between environmental gradients and effect of the DOC loci, we  
319 correlated the per-trial GWAS  $-\log_{10}(p)$  values of the two traits (HEA and GY) for *DOC3.1*  
320 and *DOC5.1* with the environmental covariates (e.g. temperature and rainfall) recorded during  
321 these experiments. Also, we made these correlations between GWAS  $-\log_{10}(p)$  values and the  
322 calculated variation of these environmental covariates, e.g. the coefficient of variation (CV)  
323 for minimal daily (night) temperature (Tmin) that represent the stability of the environmental  
324 conditions (see Methods). Finally, we made these correlations with regard to the mean  
325 normalized flowering time in each location to ask if the effect of the DOC locus is more or  
326 less effective depending on the stability of heading. The full details of the correlation  
327 coefficient between the per-trial GWAS  $-\log_{10}(p)$  values and the different environmental  
328 covariates are depicted in Table S8. Generally, we found a significant negative correlation  
329 between  $-\log_{10}(p)$  values of *DOC3.1* markers for grain yield and the mean normalized

330 heading date of the whole panel on trial ( $r = -0.37$ ,  $P=0.03$ ; Fig. 5c). We found similar  
331 correlation between HEA stability of the trial and the significance of the *DOC5.1* effects on  
332 grain yield ( $r = -0.35$ ,  $P=0.04$ ; Fig. 5c). These results suggest that the more variable was the  
333 flowering between lines the higher was the effect of the *DOC3.1* or *DOC5.1* on grain GY  
334 variation.

335 When we tested the correlations between the environmental covariates and the effect  
336 of the two loci on GY or HEA we found a difference between the two loci. For *DOC3.1*, we  
337 could identify a significant negative correlation ( $r=-0.35$ ,  $P=0.04$ ) between T<sub>min</sub> in the site of  
338 experiment and the specific *DOC3.1* GWAS  $-\log_{10}(p)$  for GY (Fig. 5e). On the other hand,  
339 the correlation between GWAS  $-\log_{10}(P)$  of GY with temperature or other environmental  
340 gradients in sites were marginal. For example, the highest correlation of  $r=0.3$  ( $P=0.055$ ) was  
341 observed between the range of maximal daily temperature (maxT<sub>mean</sub>) and  $-\log_{10}(p)$  of  
342 GWAS for GY (Table S8; Fig. 5f). Nevertheless, the correlations between environmental  
343 covariates in experimental site with the GWAS  $-\log_{10}(p)$  values for *DOC5.1* on HEA were  
344 much more significant and abundant. Moreover, these correlations appear both for the means  
345 per se, as well as for the CV of the temperatures and precipitation values. We found a strong  
346 positive correlation between per-site  $-\log_{10}(p)$  for HEA with T<sub>max</sub> ( $r=0.47$ ,  $P=0.0037$ ; Fig.  
347 5g), as well as significant correlation with CV T<sub>max</sub> ( $r=0.5$ ,  $P=0.0017$ ; Fig. 5h). These results  
348 indicate higher and/or unstable temperatures during growth period are associated with the  
349 effect of the *DOC5.1* on the flowering time variation.

350 .

351 Finally, we made these quantitative correlations between environmental covariates  
352 and genetic significance for the DOC loci identified in the US S2MET panel (Fig. 4; Table  
353 S4a). It is interesting to note that unlike the environmental-QTL correlation for effects on GY  
354 we identified for the wild allele of *DOC3.1*, we could not find any such relationship ( $P>0.05$ )  
355 for any of the DOC loci identified in the GWAS of this material. These QTL-environment  
356 correlations could only be found for the effects of *DOC3.4* and *DOC5.3* on HEA variation  
357 (Table S8).

## 358 **Discussion**

### 360 *The nature of circadian clock changes under domestication*

361 A clear difference between wild and modern breeding material is that wild accessions  
362 accelerate their rhythmicity and increase their amplitude oscillation under heat, while the  
363 cultivated genotypes are much less responsive and overall maintain a similar peripheral clock

364 (Fig. 1). In the current study we used a high throughput readout of non-photochemical  
365 quenching (NPQ) to obtain measures of clock rhythmicity (period and amplitude).  
366 Previously, Dakhiya et al. (7) showed that NPQ oscillation gives a fairly good proximation  
367 for the clock rhythms by comparing clock genes to F-based readouts in Fytoscope, mainly by  
368 using Arabidopsis mutants, i.e. *cca1* and *lhy*. Nevertheless, we showed that genetic changes  
369 in these rhythms are not always correspondent to the responses of the core clock genes, e.g.  
370 CCA1, and that these probably correspond better to peripheral rhythms such as  
371 photosynthesis. For example, the effect of the wild barley allele at *frp2.2* locus accelerated  
372 the clock under heat yet examination of CCA1 and TOC1 temporal expression did not find  
373 significant effect of this locus on this core clock gene (8). Nevertheless, despite the fact that  
374 as wild barley was faced with a more extreme environment compared to contemporary  
375 breeding material, there seems to be an advantage for plasticity of these rhythms, either  
376 directly affected by the core clock or in its transduction to peripheral activities. Accelerating  
377 the clock suggest that in a similar manner to seasonal escape mechanism, where cereal that  
378 flower earlier avoid detrimental conditions for growth and reproduction phase(31), higher  
379 daily pace may support avoidance of physiological activities in more stressful periods of the  
380 day. . Further detailed physiological and molecular analysis of nearly-isogenic lines for the  
381 DOC identified in this study, including the differential transcriptome and metabolome  
382 changes, should unravel the main pathways that will explain this accelerating strategy and its  
383 possible benefits for fitness.

384

### 385 *Genetic diversity underlying loss of clock plasticity under domestication*

386 The type of genetic material investigated in this study, as well as other comparisons between  
387 genotypic and phenotypic diversity under domestication(32–34), consider nuclear genome  
388 diversity that had obviously undergone a bottleneck (35). Moreover, recent studies are  
389 attempting to identify signatures of selection by identifying genetic sweeps across these  
390 nuclear genomes between wild and cultivated panels (36, 37). Interestingly, few of the loci  
391 we identified in this study overlap with some of the resequenced genes reported under  
392 selective sweep between wild and cultivated barley (38). This is including overlapping of the  
393 *DOC3.2* loci marker SCRI\_RS\_141171 (43,840,769) with that of BOPA2\_12\_30924, which  
394 is located on chromosome 3 631,804,839. Pankin et al.(38)found that the gene  
395 HORVU3Hr1G090440.4 spanning 631,804,086-631,808069 is under selection. However,  
396 since at least one of the major DOC loci we identified in this study, *DOC3.1*, has not been  
397 included in the list of candidate domestication genes, it is still an open question as to loss of

398 these DOC loci resulted in a signature of selection. Combining our top-down QTL approach  
399 with such bottom-up analysis could be instrumental in finding the causal variation underlying  
400 functionality of genes and their selective advantage.

401 Furthermore, with regard to the circadian clock variation and its change under  
402 domestication, as we report in this study (Fig. 1), there may be additional overlooked source  
403 of diversity that went through a genetic sweep and which has affected the loss of plasticity in  
404 the cultivated breeding material. Previously, our study of reciprocal doubled haploids within  
405 wild barley have shown a significant difference in the thermal response of the circadian clock  
406 that we could link with plasmotype diversity (8). This variation corresponded to 6 non-  
407 synonymous mutations between the founders of the populations. This suggests that in the  
408 search of variation on the clock, we should consider and design experiments that will  
409 examine the direct links between plasmotype diversity and circadian clock variation under  
410 different environments, as well as cytonuclear interactions. Such designs should also consider  
411 the fact that there is a biologically relevant interaction between the chloroplast and nuclear  
412 genomes, i.e. retrograde signaling(39), and that effects of nuclear genes on the clock and its  
413 output could be conditioned by protein or RNA partners encoded in the organelle. In fact, we  
414 recently generated a relevant cytoplasmic multi parent population (CMPP) that includes  
415 introduction of ten wild barley cytoplasm into the background of the cultivated barley(40).  
416 This new fully-homozygous infrastructure will allow us to explore these cytonuclear  
417 interactions for different phenotypic layers including circadian clock and agronomic traits in  
418 multiple sites, and to investigate in depth how such pleiotropy is maintained or lost in  
419 accordance with environmental changes.

420

#### 421 *QTL-environment association for detecting local adaptation*

422 Recently, Wadgymer et al. (41) proposed a framework for evaluating the nature of local  
423 adaptation including distinguishing between genetic tradeoffs and conditional neutrality of  
424 QTL involved in local adaptation. They, and others (42) proposed that loci that have effects  
425 on fitness in one environment, but not in alternative environments (i.e., conditional  
426 neutrality), appear to be more common. From an agricultural point of view, and obviously for  
427 the same reason of local adaptation, crop breeding is done in the target area to allow better  
428 relevance of the material. Indeed, same group took this approach and tested a panel of  
429 switchgrass and showed that adaptive trait variation has beneficial effects in some geographic  
430 regions while conferring little or no detectable cost in other parts of the geographic range  
431 (43). Similarly, here we demonstrate that among the significantly associated loci the

432 percentage of markers repeated in more than several sites/years is low for GY and much more  
433 for HEA (Fig. 5a and 5b). This could be because GY is a complex trait with relatively low  
434 heritability that influence from several other traits(44). Nevertheless, the markers found for  
435 clock rhythmicity (DOCs) are found significant for HEA and GY in more trials than other  
436 markers, suggesting that they are involved in local adaptation. Moreover, we also provide an  
437 alternative quantitative approach to test the level of local adaptation with regard to the  
438 environmental agents involved. This is simply done by performing per-trial GWAS to obtain  
439 the significance (P value) of the SNPs and then perform correlation, or other similar  
440 association test, to examine relationship of significance with environmental co-variates. This  
441 approach is different than counting the frequency of single nucleotide polymorphisms (SNPs)  
442 associated with fitness and how it co-varied with climate across the range of experiments  
443 conducted (Fournier-Level et al. 2013).

444

#### 445 *The adaptive value of plasticity vs robustness under domestication and its molecular basis*

446 In a previous study, we showed that within the wild barley populations there is a  
447 standing variation for the circadian clock plasticity and that that it varies between accessions  
448 adapted to different niches. For example, the B1K-09-07 that served as a parent of the  
449 ASHER DH population showed significant shortening of the clock rhythm (by more than 3  
450 hr; (8)). This is compared to relative robust clock of B1K-50-04, an accession from the colder  
451 Northern part of the B1K collection (25), for which the period shortened slightly by one hour.  
452 This, and the fact that a significant relationship between temperature at the site of collection  
453 and the clock period was found indicated the adaptive value of the clock to changing  
454 environment in the wild(7). But how would that be relevant in agriculture, and why do we  
455 observe loss of such plasticity, as exemplified by overall lesser response for both period and  
456 amplitude (Fig. 1), and also by loss of significant plasticity QTL such as *DOC3.1*? One  
457 obvious reason might be that modern cultivars were bred in a more stable environment than  
458 their wild ancestors, and more specifically, more homogeneity in sites in the different sites of  
459 cultivation vs growth of wild populations in wide adaptive niche (25).

460 Vis-à-vis adaptation under domestication for barley and lack of environmental  
461 responsiveness involved, it was shown previously that misexpression of barley ortholog for  
462 the Arabidopsis circadian-clock gene *ELF3* of circadian clock gene in the *eam* mutants (19).  
463 This mutation allowed early-flowering day-neutral phenotype with rapid flowering under  
464 either short or long day (45). This may suggest that under cultivation loss or change of  
465 circadian clock functions such as light responses have been favored, e.g. deletion and

466 mutations in the EID and LNK2 genes in cultivated tomato found to be responsible for the  
467 clock deceleration (24). Since a direct link between allelic changes from wild to the  
468 cultivated tomato for yield has not been shown yet, but only that of growth (24), it is still  
469 remains to be studied what is the adaptive value of these mutations. Besides, are loss of  
470 function for clock genes is typical to these changes under domestication as reported so far?  
471 and if not, and functional alleles were retained, could that suggest a repurposing of the genes  
472 for rhythmicity, and its plasticity, to yield adaptation? Further isolation of the causal genes  
473 underlying DOC and the study of their possible pleiotropic effects on agronomic traits, as  
474 well their biochemical functions, will be required to answers to these questions.

475

## 476 **Materials and methods**

### 477 *Plant material and genotypic data*

478 For this clock thermal plasticity analysis, we used tree Barley panel: wild barley  
479 (*Hordeum spontaneum*), interspecific multiparent barley population HEB-25 and breeding  
480 cultivated panel (*H. vulgare*). We selected two hundred and eighty-three accessions of wild  
481 barley which are single-seed descents from our original Barley1K collection (25). The B1K  
482 accessions were collected in hierarchical manner (5 microsites in each location) from 51 sites  
483 that represent a broad genetic and ecogeographic adaptation. We initially attempted to select  
484 one representative accessions from each micro-site and more from sites showing relatively  
485 higher genetic diversity based on SSR analysis of the collection (25). For the HEB  
486 population, we selected three hundred thirty-eight lines that represent all 25 families. These  
487 25 HEB families were generated by introduction of different *H. spontaneum* accessions into  
488 the background of the cultivated Barke background (26). All original BC<sub>1</sub>S<sub>3</sub> lines (two  
489 generations earlier) and their corresponding parents were genotyped using the barley  
490 Infinium iSelect 9K chip (26), consisting of 7864 SNPs (46). The single seed descended HEB-  
491 25 lines we used for the clock measurements are a BC<sub>1</sub>S<sub>3::5</sub>. Two hundred thirty-two  
492 cultivated barley (*H. vulgare*) from the US Spring Two-Row Multi-Environment Trial  
493 (S2MET) are an advanced cultivated breeding material for adapting into environmental  
494 changes (27). This panel consists of one-eighty-three lines from five U.S. breeding programs  
495 and 50 are from crosses between some of these lines.

496

### 497 *Clock phenotype under optimal and high temperature*

498 To mimic the natural growth conditions of the wild barley population in the Southern Levant,  
499 where the original Barley1K infrastructure was collected (25). Plants were grown to the

500 emergence of the fourth leaf under 10h light and 14h dark, at a constant temperature of 20°C.  
501 We grew the two other panels up to the emergence of the fourth leaf under 14h light and 10h  
502 dark to mimic the spring growing of Barke in Europe and in the US. Following this  
503 entrainment of the plants for four weeks, we moved them to the high-throughput SensyPAM  
504 (SensyTIV, Aviel, Israel) custom-designed to allow F measurements in up to 240 plants for  
505 each experiment (see details at (8)). For the clock measurement, F was measured every 2.5  
506 hours, for 3 days, in continuous light. We measured each genotype twice under each  
507 temperature, with 4 to 5 plants included in each round. For the clock analysis, NPQ<sub>ss</sub> ((F<sub>m</sub>-  
508 F<sub>mlss</sub>)/F<sub>mlss</sub>) was calculated and normalized by the one control line that appeared in each  
509 experiment. The circadian clock free running period (FRP), amplitude (AMP) and amplitude  
510 error were extracted using the BioDare2 website (<https://biodare2.ed.ac.uk>). The input data  
511 was set to "cubic dtr" and the "MFourFit" was used as the analysis method (47).

512

### 513 *Statistical analysis*

514 We used the JMP version 14.0 statistical package (SAS Institute, Cary, NC, USA) for  
515 statistical analyses and for generating reaction norms for the means and standard errors of the  
516 different traits. Student's t-Tests between treatments were conducted per panel using the 'Fit  
517 Y by X' function. A factorial model was employed for the analysis of variance (ANOVA,  
518 table Sx), using 'Fit model', with temperature treatment and panel as fixed effects. The  
519 density plot was made using MVAPP(48).

520

### 521 *Genome-wide association study (GWAS)*

522 We conducted genome-wide association to identify trait variations, per-se, under optimal and  
523 high temperatures (OT and HT), and to assess di-genic interactions (2D-scan). Since the  
524 methods of choice (genetic model and statistics) for the genome scan have a major effect on  
525 the loci identified we compared between several options to point into most reliable signals  
526 that we could support by more than one method:

527

528 *Extended Bayesian Lasso (EBL)*: EBL (49) is the extension of Bayesian Lasso (50), that  
529 separates the regularisation parameter into a shrinkage factor for the overall model sparsity  
530 ( $\delta^2$ ) and a shrinkage factor for individual markers ( $\eta_p^2$ ). This approach is intended to assign  
531 different magnitudes of shrinkage to individual marker effects. In EBL, the following linear  
532 model was used:



$$y_i = \sum_{p=1}^P x_{ip} \beta_p + \varepsilon_i$$

533 where  $y_i$  is a phenotypic value of individual  $i$ ,  $x_{ip}$  is a genotype of marker  $p$  of individual  $i$ ,  
534  $\beta_p$  is a effect of marker  $p$ , and  $\varepsilon_i$  is a residual for the individual  $i$  with  $\varepsilon_i \sim N(0, \sigma_e^2)$ . Each  
535 regression parameter  $\beta_p$  is assumed to follow

$$\beta_p \sim N\left(0, 1/\tau_0^2 \tau_p^2\right)$$

536 where  $\tau_p^2$  determines the magnitude of shrinkage for  $\beta_p$ , and  $1/\tau_0^2$  is the residual variance,  
537 respectively. Then,  $\tau_p^2$  was assumed to follow a prior distribution

$$\tau_p^2 \sim Inv - G\left(1, \delta^2 \eta_p^2 / 2\right)$$

538 where  $Inv - G$  indicates the inverse Gamma distribution,  $\delta^2$  is the shrinkage factor for all  
539 markers and  $\eta_p^2$  is the shrinkage factor unique to marker  $p$ . A prior distribution for  $\delta^2$   
540 was  $\delta^2 \sim G(1, 1)$ , and for  $\eta_p^2$  was  $\eta_p^2 \sim G(1, \theta)$  where the rate parameter  $\theta$  is the  
541 hyperparameter for EBL. Three values of  $\theta$  were tested: 0.1, 1, and 5 and a nested five-fold  
542 CV was performed to determine the optimal hyperparameter. The EBL was performed by  
543 using function *vigor* in the R package “VIGoR” (51). Then absolute value of  $\beta_p$  was used as  
544 the GWAS score.

545  
546

547 **Tassel MLM:** Mixed Linear Model (MLM) in Tassel software considers both population  
548 structure and kinship in the association analysis. It reduces Type I error due to relatedness and  
549 population structure. MLM was used to identify the associations between phenotypic and  
550 genotypic data in Tassel v5.2.5.0 (52) with optimal compression and variance component  
551 estimation by P3D (population parameters previously determined). The P value indicated the  
552 degree of association between a SNP marker and a trait, and the  
553  $R^2$  depicts the variation explained by the significantly associated markers. Markers with an  
554 adjusted  $-\log_{10}(\text{P-value}) \geq 3.0$  were regarded as significant for all traits.

555

## 556 **Two-dimensional genome scan (2D-scan)**

557 For 2D-scan, we considered following linear mixed models:

$$M_{full} : y = \mu + g + \beta_i m_i + \beta_j m_j + \gamma_{ij} (m_i \times m_j) + \epsilon$$

$$M_{add} : y = \mu + g + \beta_i m_i + \beta_j m_j + \epsilon$$

$$M_i : y = \mu + g + \beta_i m_i + \epsilon$$

$$M_j : y = \mu + g + \beta_j m_j + \epsilon$$

558 where  $y$  represents a vector of phenotype,  $m_x$  represents coded genotypic values of marker  
559  $x$  (-1 and 1 for homozygous, 0 for heterozygous),  $\beta_x$  represents effect of marker  $x$ ,  $\gamma_{ij}$   
560 represents a vector of coefficients for interaction between marker  $i$  and  $j$  ( $m_i \times m_j$ ), The variable  
561  $g$  models the genetic background of each line as a random effect with  $g \sim N(0, K\sigma_G^2)$ , where  $K$   
562 is a kinship matrix calculated from the nucleotide polymorphisms, and  $\sigma_G^2$  is the genetic  
563 variance.  $\epsilon$  represents the residual error such that  $\epsilon \sim N(0, I\sigma_e^2)$ , where  $I$  is an identity matrix  
564 and  $\sigma_e^2$  is the residual variance.  $M_i$  and  $M_j$  are equivalent to the model used for single marker  
565 based GWAS.  $M_{add}$  is a model to test additive effects of two loci while  $M_{full}$  include both  
566 additive and interactive effects of two loci. Then, we derived two  $P$ -values from the above  
567 models.

$$LL_1 = \max\{LL_i, LL_j\}$$

$$P_{add} = \chi_1^2(LL_{add} - LL_1)$$

$$P_{int} = \chi_{df.int}^2(LL_{int} - LL_{add})$$

568 where  $LL_{int}$ ,  $LL_{add}$ ,  $LL_i$  and  $LL_j$  are log likelihood for  $M_{int}$ ,  $M_{add}$ ,  $M_i$  and  $M_j$ , respectively.  $P_{add}$   
569 was used to test significance of addition of a locus to the another.  $P_{int}$  was used to test  
570 significance of interactive effect.  $df.int$  is degree of freedom for two loci interactive effect  
571 that is equivalent to number of combination patterns in the given two loci. To solve the linear  
572 mixed models used in the 2D-scan, we used the R package “gaston” (53)(54). Maximum  
573 likelihood estimates of variance components were obtained using function *lmm.diago*, and  
574 log likelihood of each model was calculated using function *lmm.diago.profile.likelihood*.

575

#### 576 *Correlations between environmental covariates and GWAS results*

577 The full environmental covariate data appears at Neyhart et al. (27). For the analysis in our  
578 current study we calculated the daily mean temperature according to the daily min and max  
579 temperature in each field trial. From this data we calculated the mean of the minimal (min),  
580 maximal(max) and mean daily temperature, and the range of the mean daily temperature. In  
581 addition, we calculated the maximum of the mean and max temperatures and the CV for the  
582 min, max and mean daily temperature. We also used the cumulative perception in each trial  
583 and calculate the GDD. We also normalized the HEA and GY in each trial following similar  
584 normalization conducted by Merchuk et al. (2018) for multiple year

$$\frac{HEA_{line} - \min HEA_{trial}}{\max HEA_{trial} - \min HEA_{trial}}$$

585

586

587

588 **ACKNOWLEDGEMENTS**

589 This work was supported by the Israeli Science Foundation (ISF) program (1270/17) and the

590 Chief Scientist Competitive Grant (20-01-0080) from the Ministry of Agriculture to E.F.

591

592

593 **Bibliography**

594

595 1. C. R. McClung, Plant circadian rhythms. *Plant Cell* (2006)

596 <https://doi.org/10.1105/tpc.106.040980>.

597 2. A. N. Dodd, *et al.*, Cell biology: Plant circadian clocks increase photosynthesis,  
598 growth, survival, and competitive advantage. *Science* (80-. ). (2005)

599 <https://doi.org/10.1126/science.1115581>.

600 3. K. Greenham, C. R. McClung, Integrating circadian dynamics with physiological  
601 processes in plants. *Nat. Rev. Genet.* (2015) <https://doi.org/10.1038/nrg3976>.

602 4. K. D. Edwards, J. R. Lynn, P. Gyula, F. Nagy, A. J. Millar, Natural allelic variation in  
603 the temperature-compensation mechanisms of the *Arabidopsis thaliana* circadian  
604 clock. *Genetics* (2005) <https://doi.org/10.1534/genetics.104.035238>.

605 5. W. Y. Kim, *et al.*, ZEITLUPE is a circadian photoreceptor stabilized by GIGANTEA  
606 in blue light. *Nature* (2007) <https://doi.org/10.1038/nature06132>.

607 6. M. K. Choudhary, Y. Nomura, L. Wang, H. Nakagami, D. E. Somers, Quantitative  
608 circadian phosphoproteomic analysis of *Arabidopsis* reveals extensive clock control of  
609 key components in physiological, metabolic, and signaling pathways. *Mol. Cell.*  
610 *Proteomics* (2015) <https://doi.org/10.1074/mcp.M114.047183>.

611 7. Y. Dakhiya, D. Hussien, E. Fridman, M. Kiflawi, R. Green, Correlations between  
612 circadian rhythms and growth in challenging environments. *Plant Physiol.* (2017)  
613 <https://doi.org/10.1104/pp.17.00057>.

614 8. E. Bdolach, *et al.*, Thermal plasticity of the circadian clock is under nuclear and  
615 cytoplasmic control in wild barley. *Plant Cell Environ.* (2019)  
616 <https://doi.org/10.1111/pce.13606>.

617 9. P. D. Gould, *et al.*, Delayed fluorescence as a universal tool for the measurement of  
618 circadian rhythms in higher plants. *Plant J.* (2009) [https://doi.org/10.1111/j.1365-](https://doi.org/10.1111/j.1365-313X.2009.03819.x)  
619 [313X.2009.03819.x](https://doi.org/10.1111/j.1365-313X.2009.03819.x).

620 10. L. Valleliau-Bindschedler, E. Mösinger, J. P. Métraux, P. Schweizer, Structure,  
621 expression and localization of a germin-like protein in barley (*Hordeum vulgare* L.)  
622 that is insolubilized in stressed leaves. *Plant Mol. Biol.* (1998)  
623 <https://doi.org/10.1023/A:1005982715972>.

624 11. M. Martínez, I. Rubio-Somoza, P. Carbonero, I. Díaz, A cathepsin B-like cysteine  
625 protease gene from *Hordeum vulgare* (gene CatB) induced by GA in aleurone cells is  
626 under circadian control in leaves. *J. Exp. Bot.* (2003)

- 627 <https://doi.org/10.1093/jxb/erg099>.
- 628 12. C. Lillo, Circadian rhythmicity of nitrate reductase activity in barley leaves. *Physiol.*  
629 *Plant.* (1984) <https://doi.org/10.1111/j.1399-3054.1984.tb05900.x>.
- 630 13. S. Nagasaka, *et al.*, Time course analysis of gene expression over 24 hours in Fe-  
631 deficient barley roots. *Plant Mol. Biol.* (2009) [https://doi.org/10.1007/s11103-008-](https://doi.org/10.1007/s11103-008-9443-0)  
632 9443-0.
- 633 14. R. P. Dunford, S. Griffiths, V. Christodoulou, D. A. Laurie, Characterisation of a  
634 barley (*Hordeum vulgare* L.) homologue of the Arabidopsis flowering time regulator  
635 GIGANTEA. *Theor. Appl. Genet.* (2005) <https://doi.org/10.1007/s00122-004-1912-5>.
- 636 15. A. Turner, J. Beales, S. Faure, R. P. Dunford, D. A. Laurie, Botany: The pseudo-  
637 response regulator Ppd-H1 provides adaptation to photoperiod in barley. *Science* (80-  
638 ). (2005) <https://doi.org/10.1126/science.1117619>.
- 639 16. J. A. Higgins, P. C. Bailey, D. A. Laurie, Comparative genomics of flowering time  
640 pathways using brachypodium distachyon as a model for the temperate Grasses. *PLoS*  
641 *One* (2010) <https://doi.org/10.1371/journal.pone.0010065>.
- 642 17. C. Campoli, M. Shtaya, S. J. Davis, M. von Korff, Expression conservation within the  
643 circadian clock of a monocot: natural variation at barley Ppd-H1 affects circadian  
644 expression of flowering time genes, but not clock orthologs. *BMC Plant Biol.* (2012)  
645 <https://doi.org/10.1186/1471-2229-12-97>.
- 646 18. C. Campoli, *et al.*, HvLUX1 is a candidate gene underlying the early maturity 10 locus  
647 in barley: Phylogeny, diversity, and interactions with the circadian clock and  
648 photoperiodic pathways. *New Phytol.* (2013) <https://doi.org/10.1111/nph.12346>.
- 649 19. S. Faure, *et al.*, Mutation at the circadian clock gene EARLY MATURITY 8 adapts  
650 domesticated barley (*Hordeum vulgare*) to short growing seasons. *Proc. Natl. Acad.*  
651 *Sci. U. S. A.* (2012) <https://doi.org/10.1073/pnas.1120496109>.
- 652 20. S. Zakhrabekova, *et al.*, Induced mutations in circadian clock regulator Mat-a  
653 facilitated short-season adaptation and range extension in cultivated barley. *Proc. Natl.*  
654 *Acad. Sci. U. S. A.* (2012) <https://doi.org/10.1073/pnas.1113009109>.
- 655 21. L. Müller, *et al.*, Differential effects of day-night cues and the circadian clock on the  
656 barley transcriptome. *Plant Physiol.* (2020) <https://doi.org/10.1104/pp.19.01411>.
- 657 22. C. Bendix, C. M. Marshall, F. G. Harmon, Circadian Clock Genes Universally Control  
658 Key Agricultural Traits. *Mol. Plant***8**, 1135–1152 (2015).
- 659 23. R. L. Murphy, *et al.*, Coincident light and clock regulation of pseudoreponse regulator  
660 protein 37 (PRR37) controls photoperiodic flowering in sorghum. *Proc. Natl. Acad.*

- 661 *Sci. U. S. A.* (2011) <https://doi.org/10.1073/pnas.1106212108>.
- 662 24. N. A. Müller, L. Zhang, M. Koornneef, J. M. Jiménez-Gómez, Mutations in EID1 and  
663 LNK2 caused light-conditional clock deceleration during tomato domestication. *Proc.*  
664 *Natl. Acad. Sci. U. S. A.* (2018) <https://doi.org/10.1073/pnas.1801862115>.
- 665 25. S. Hübner, *et al.*, Strong correlation of wild barley (*Hordeum spontaneum*) population  
666 structure with temperature and precipitation variation. *Mol. Ecol.* (2009)  
667 <https://doi.org/10.1111/j.1365-294X.2009.04106.x>.
- 668 26. A. Maurer, *et al.*, Modelling the genetic architecture of flowering time control in  
669 barley through nested association mapping. *BMC Genomics* (2015)  
670 <https://doi.org/10.1186/s12864-015-1459-7>.
- 671 27. J. L. Neyhart, *et al.*, Registration of the S2MET Barley Mapping Population for Multi-  
672 Environment Genomewide Selection. *J. Plant Regist.* (2019)  
673 <https://doi.org/10.3198/jpr2018.06.0037crmp>.
- 674 28. N. A. Müller, *et al.*, Domestication selected for deceleration of the circadian clock in  
675 cultivated tomato. *Nat. Genet.* (2015) <https://doi.org/10.1038/ng.3447>.
- 676 29. L. Merchuk-Ovnat, *et al.*, Genome scan identifies flowering-independent effects of  
677 barley HsDry2.2 locus on yield traits under water deficit. *J. Exp. Bot.* (2018)  
678 <https://doi.org/10.1093/jxb/ery016>.
- 679 30. E. B. Josephs, Determining the evolutionary forces shaping  $G \times E$ . *New Phytol.* (2018)  
680 <https://doi.org/10.1111/nph.15103>.
- 681 31. Y. Shavrukov, *et al.*, Early flowering as a drought escape mechanism in plants: How  
682 can it aid wheat production? *Front. Plant Sci.* (2017)  
683 <https://doi.org/10.3389/fpls.2017.01950>.
- 684 32. K. M. Olsen, J. F. Wendel, A Bountiful Harvest: Genomic Insights into Crop  
685 Domestication Phenotypes. *Annu. Rev. Plant Biol.* (2013)  
686 <https://doi.org/10.1146/annurev-arplant-050312-120048>.
- 687 33. A. L. Caicedo, *et al.*, Genome-wide patterns of nucleotide polymorphism in  
688 domesticated rice. *PLoS Genet.* (2007) <https://doi.org/10.1371/journal.pgen.0030163>.
- 689 34. S. I. Wright, *et al.*, Evolution: The effects of artificial selection on the maize genome.  
690 *Science (80-. )*. (2005) <https://doi.org/10.1126/science.1107891>.
- 691 35. S. Tanksley, S. McCouch, Seed banks and molecular maps: unlocking genetic  
692 potential from the wild. *Science (80-. )*. **277**, 1063–1066 (1997).
- 693 36. H. Bourguiba, *et al.*, Loss of genetic diversity as a signature of apricot domestication  
694 and diffusion into the Mediterranean Basin. *BMC Plant Biol.* **12**, 49 (2012).

- 695 37. J. Shi, J. Lai, Patterns of genomic changes with crop domestication and breeding.  
696 *Curr. Opin. Plant Biol.* (2015) <https://doi.org/10.1016/j.pbi.2015.01.008>.
- 697 38. A. Pankin, J. Altmüller, C. Becker, M. von Korff, Targeted resequencing reveals  
698 genomic signatures of barley domestication. *New Phytol.* (2018)  
699 <https://doi.org/10.1111/nph.15077>.
- 700 39. M. A. Jones, Retrograde signalling as an informant of circadian timing. *New Phytol.*,  
701 1–5 (2018).
- 702 40. E. Fridman, M. R. Prusty, A. Faigenboim-Doron, E. Bdolach, Barley Cytoplasmic  
703 Multi Parent Population (CMPP) for Studying Evolution of Plasticity Under  
704 Domestication in *The Allied Genetics Conference*, (Genetics Society of America,  
705 2020).
- 706 41. S. M. Wadgyamar, *et al.*, Identifying targets and agents of selection: innovative  
707 methods to evaluate the processes that contribute to local adaptation. *Methods Ecol.*  
708 *Evol.* (2017) <https://doi.org/10.1111/2041-210X.12777>.
- 709 42. O. Savolainen, M. Lascoux, J. Merilä, Ecological genomics of local adaptation. *Nat.*  
710 *Rev. Genet.* (2013) <https://doi.org/10.1038/nrg3522>.
- 711 43. D. B. Lowry, *et al.*, QTL × environment interactions underlie adaptive divergence in  
712 switchgrass across a large latitudinal gradient. *Proc. Natl. Acad. Sci. U. S. A.* (2019)  
713 <https://doi.org/10.1073/pnas.1821543116>.
- 714 44. S. O. Assanga, *et al.*, Mapping of quantitative trait loci for grain yield and its  
715 components in a US popular winter wheat TAM 111 using 90K SNPs. *PLoS One*  
716 (2017) <https://doi.org/10.1371/journal.pone.0189669>.
- 717 45. A. Börner, G. H. Buck-Sorlin, P. M. Hayes, S. Malyshev, V. Korzun, Molecular  
718 mapping of major genes and quantitative trait loci determining flowering time in  
719 response to photoperiod in barley. *Plant Breed.* (2002) <https://doi.org/10.1046/j.1439-0523.2002.00691.x>.
- 720
- 721 46. J. Comadran, *et al.*, Natural variation in a homolog of Antirrhinum  
722 CENTRORADIALIS contributed to spring growth habit and environmental adaptation  
723 in cultivated barley. *Nat. Genet.* **44**, 1388–92 (2012).
- 724 47. T. Zielinski, A. M. Moore, E. Troup, K. J. Halliday, A. J. Millar, Strengths and  
725 limitations of period estimation methods for circadian data. *PLoS One* (2014)  
726 <https://doi.org/10.1371/journal.pone.0096462>.
- 727 48. M. M. Julkowska, S. Saade, G. Agarwal, G. Gao, Y. Pailles, MVApp — Multivariate  
728 Analysis Application for Streamlined Data Analysis and Curation 1 [ OPEN ]. **180**,

- 729 1261–1276 (2019).
- 730 49. C. M. Mutshinda, M. J. Sillanpää, Extended Bayesian LASSO for multiple quantitative  
731 trait loci mapping and unobserved phenotype prediction. *Genetics* (2010)  
732 <https://doi.org/10.1534/genetics.110.119586>.
- 733 50. T. Park, G. Casella, The Bayesian Lasso. *J. Am. Stat. Assoc.* (2008)  
734 <https://doi.org/10.1198/016214508000000337>.
- 735 51. , VIGoR: Variational Bayesian Inference for Genome-Wide Regression. *J. Open Res.*  
736 *Softw.* (2016) <https://doi.org/10.5334/jors.80>.
- 737 52. P. J. Bradbury, *et al.*, TASSEL: Software for association mapping of complex traits in  
738 diverse samples. *Bioinformatics* (2007) <https://doi.org/10.1093/bioinformatics/btm308>.
- 739 53. C. Xhaard, *et al.*, Heritability of a resting heart rate in a 20-year follow-up family  
740 cohort with GWAS data: Insights from the STANISLAS cohort. *Eur. J. Prev. Cardiol.*  
741 (2019) <https://doi.org/10.1177/2047487319890763>.
- 742 54. H. Perdry, C. Dandine-Roulland, gaston: Genetic Data Handling (QC, GRM, LD,  
743 PCA) & Linear Mixed Models.  
744  
745  
746  
747  
748  
749  
750  
751  
752  
753  
754  
755  
756  
757  
758  
759  
760  
761  
762



763 Figures legends

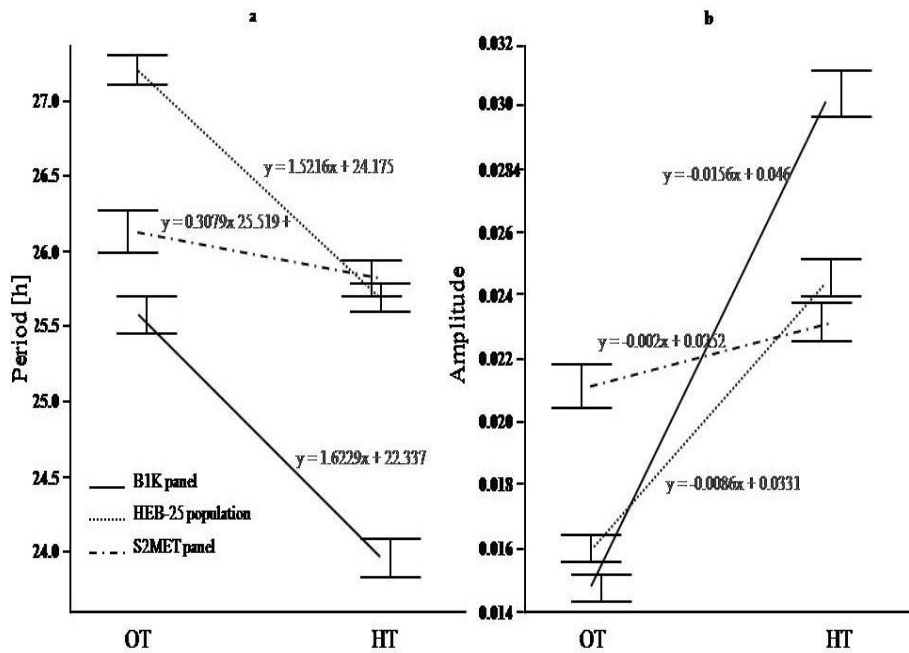

764 **Figure 1:** Differential rhythms and thermal plasticity between barley wild panel (Barley1K,  
765 B1K), interspecific multiparent population (HEB) and cultivated breeding (S2MET) plant  
766 material. Circadian rhythms reaction norms of barley wild *H. spontaneum* panel (n=283),  
767 HEB-25 interspecific multiparent population (N=338) and advanced cultivated *H. vulgare*  
768 breeding material (N=232) under two thermal environments, optimal temperature (OT; 22°C)  
769 and high temperature (HT; 32°C) for clock period (A) and amplitude (B).

770  
771  
772  
773  
774  
775  
776  
777  
778  
779  
780  
781  
782

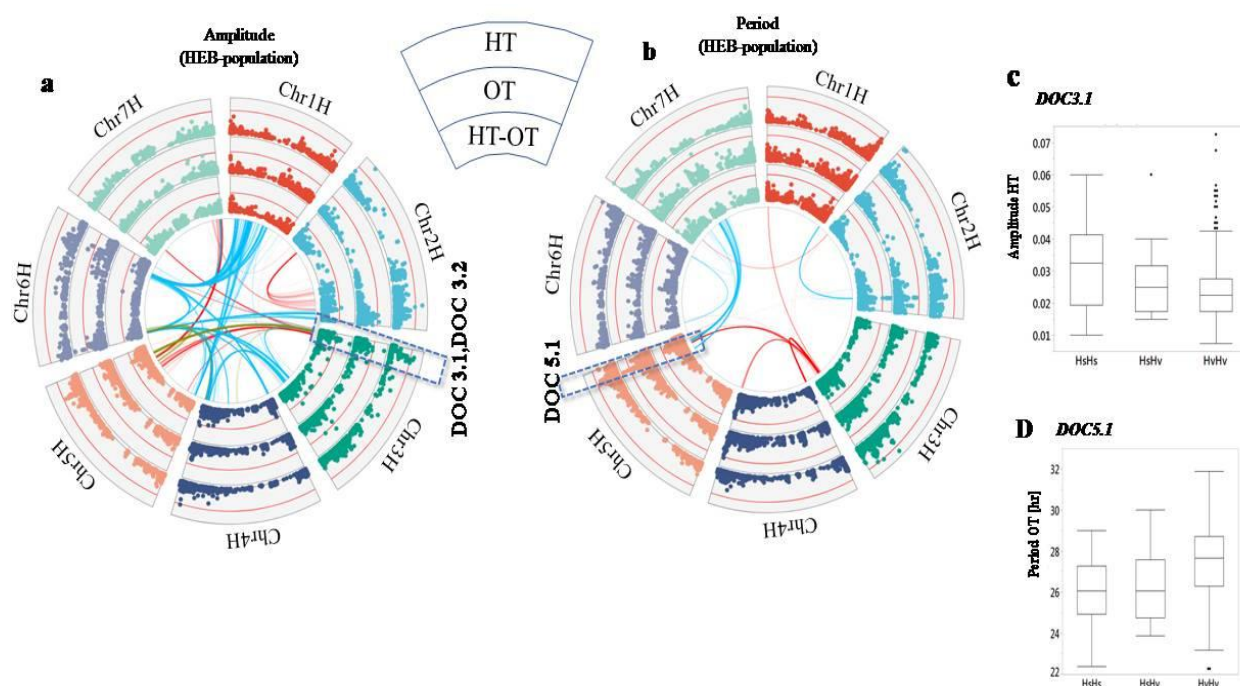

783 **Figure 2:** Circos plots depicting the GWAS results for (a)Amplitude and (b)Period of the  
 784 clock in HEB population. Barley chromosomes in the plot are depicted in different  
 785 colors. Outer, middle and inner Manhattan plots indicate  $-\log_{10}(p)$  of one-dimensional GWAS  
 786 for high temperature (HT), optimal temperature (OT) and for the delta (HT-OT), respectively.  
 787 Red lines in the Manhattan plots indicate significant threshold ( $p = 0.001$ ). Links in the center  
 788 of the circles indicate significant di-genic interactions detected by two-dimensional two-locus  
 789 genome-wide association study ( $p = 0.001$ ). Red, blue and yellow links indicate high  
 790 temperature, optimal temperature and the delta, respectively. *DOC3.1*, *3.2*&*5.1* appear in all  
 791 the three methods (LMM,MLM and EBL) analysis and hence are demarked in the circos.  
 792 Boxplots of clock plasticity for (c) *DOC3.1* effects on Amplitude and (d) *DOC5.1* effects on  
 793 Period. HsHs, homozygous for wild allele; HsHv, heterozygous for wild and cultivated allele,  
 794 and HvHv, homozygous for cultivated allele.

795  
 796  
 797  
 798  
 799  
 800  
 801

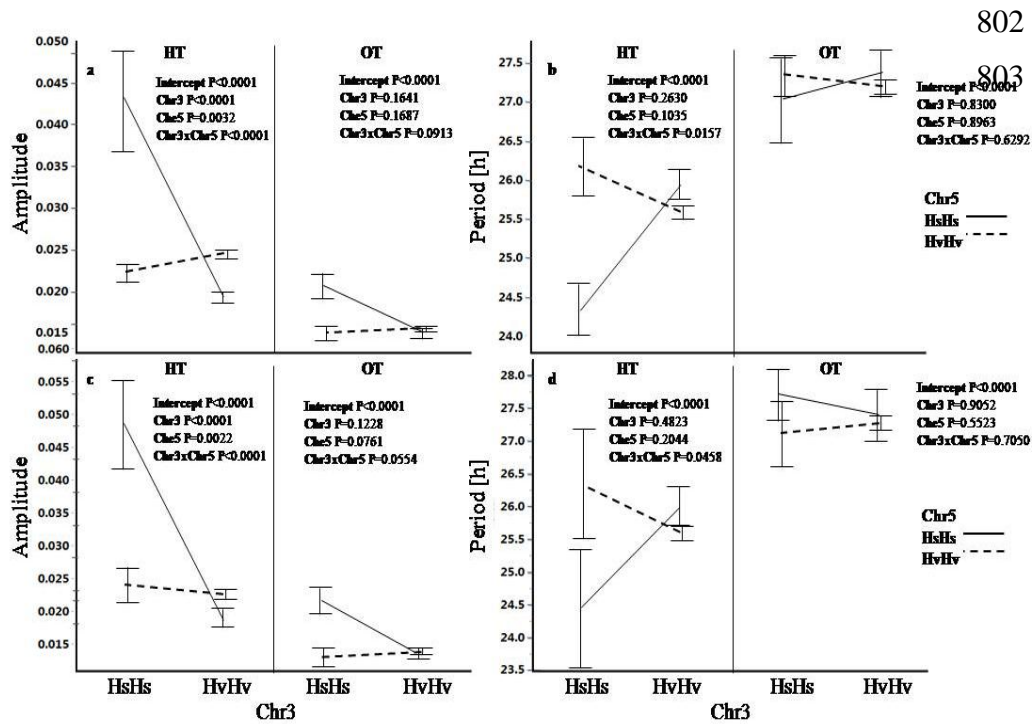

804 **Figure 3:** Epistatic interactions between DOC loci on chromosome 3 and 5 for clock  
 805 amplitude and period. Least-square mean value comparisons (reaction norms) for the (a and b)  
 806 *DOC3.1* (position 30,927,745) and (c and d) *DOC3.2* (position 47,570,630) genotypes under  
 807 optimal temperature (OT; 22°C) and high temperature (HT; 32°C) in the HEB population. A  
 808 two-way ANOVA including each pair of loci in chromosome 3 and 5 tested if the interaction  
 809 is significant.

810  
 811  
 812  
 813  
 814  
 815  
 816  
 817  
 818  
 819  
 820  
 821  
 822  
 823

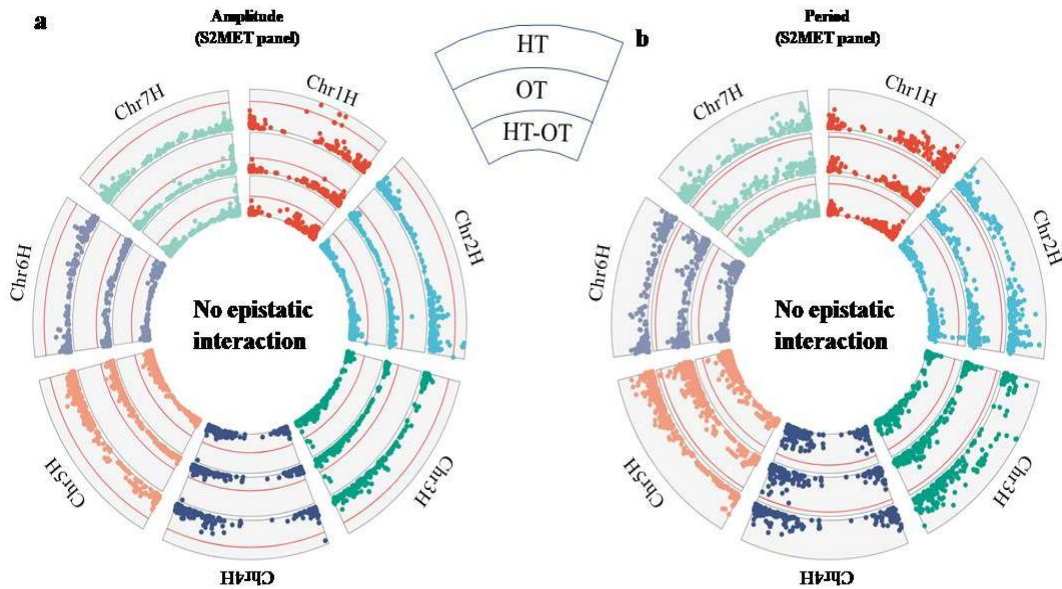

824

825 **Figure 4:** Circos plots depicting the GWAS results for (a) Amplitude and (b) Period in  
826 S2MET panel. Barley chromosomes in the plot are depicted in different colors. Outer, middle  
827 and inner Manhattan plots indicate  $-\log_{10}(p)$  of one-dimensional GWAS for high temperature  
828 (HT), optimal temperature (OT) and the delta between values (HT-OT), respectively. Red  
829 lines in the Manhattan plots indicate significant threshold ( $p = 0.001$ ).

830

831

832

833

834

835

836

837

838

839

840

841

842

843

844

845

846

847

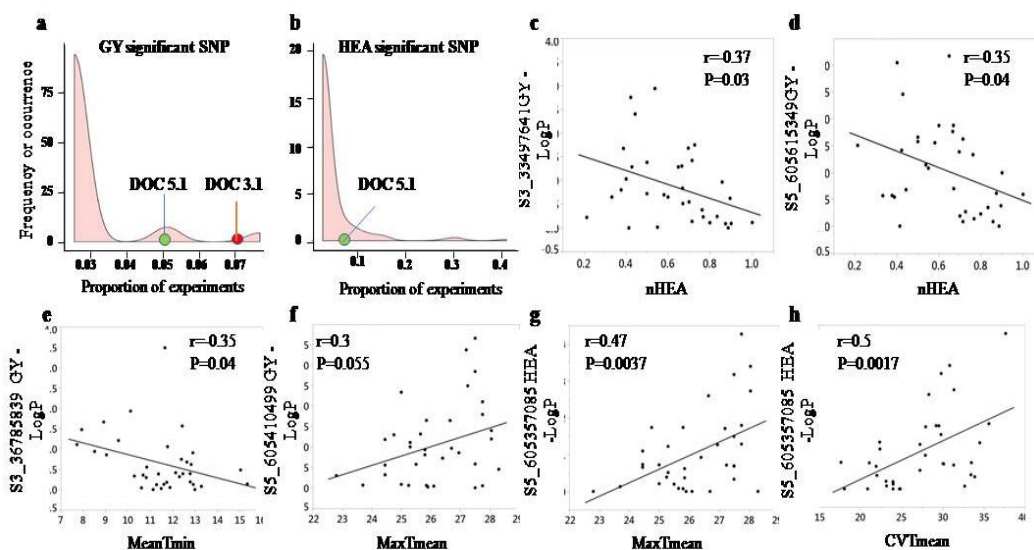

849 **Figure 5:** QTL-environment association for DOC loci show their stable and temperature-  
 850 dependent effects on heading date (HEA) and grain yield (GY) variation in S2MET panel  
 851 grown across US. Density plots representing the frequency SNP that are significantly  
 852 ( $LOD > 3$ ) associated with (a) HEA or (b) GY variation. Frequency or occurrence (X-axis) is  
 853 expressed as proportion of experiments (out of 39) in which association marker-traits is  
 854 significant. Red and green dots on the X-axis demarcate the occurrence of *DOC3.1* and  
 855 *DOC5.1* loci for GY and HEA. The correlations between normalized heading date at  
 856 experimental site and significance of the (c) *DOC3.1* or (d) *DOC5.1* association with GY in  
 857 the S2MET panel. The correlations between Tmin in experimental sites and GWAS  $-\log_{10}(p)$   
 858 values for (e) *DOC3.1* and (f) *DOC5.1* for GY. *DOC5.1*-temperature association is depicted  
 859 by the positive correlations of (g) minimal temperature (Tmin) and (h) CV of Tmin with  
 860 GWAS  $-\log_{10}(p)$  values for *DOC5.1* effect on GY in S2MET panel.

861

862

863 Supplementary figures legends

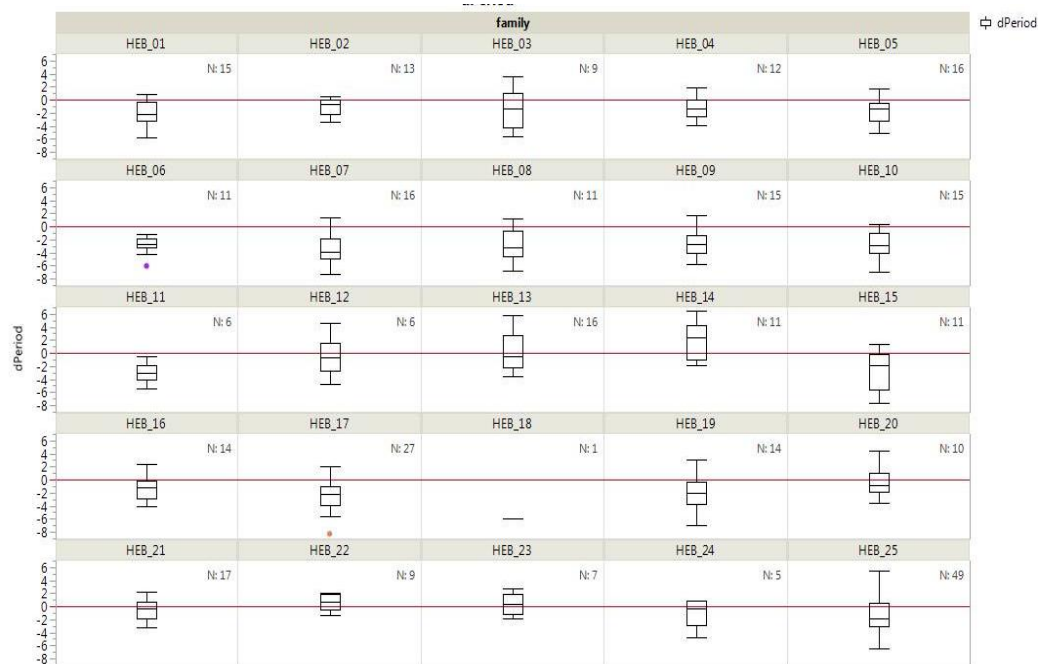

864 **Figure S1:**Differential period thermal plasticity in the HEB-25 families. Box plots for  
865 dPeriod among each of the sub-populations (each with a different *H. spontaneum* donor;  
866 (26)) of the interspecific multi-parent barley population HEB-25. dPeriod is the period under  
867 high temperature (HT; 32°C) minus that under optimal temperature (OT; 22°C). The red line  
868 represents dPeriod=0 that means no period plasticity.

869  
870  
871  
872  
873  
874  
875  
876  
877  
878  
879  
880  
881  
882

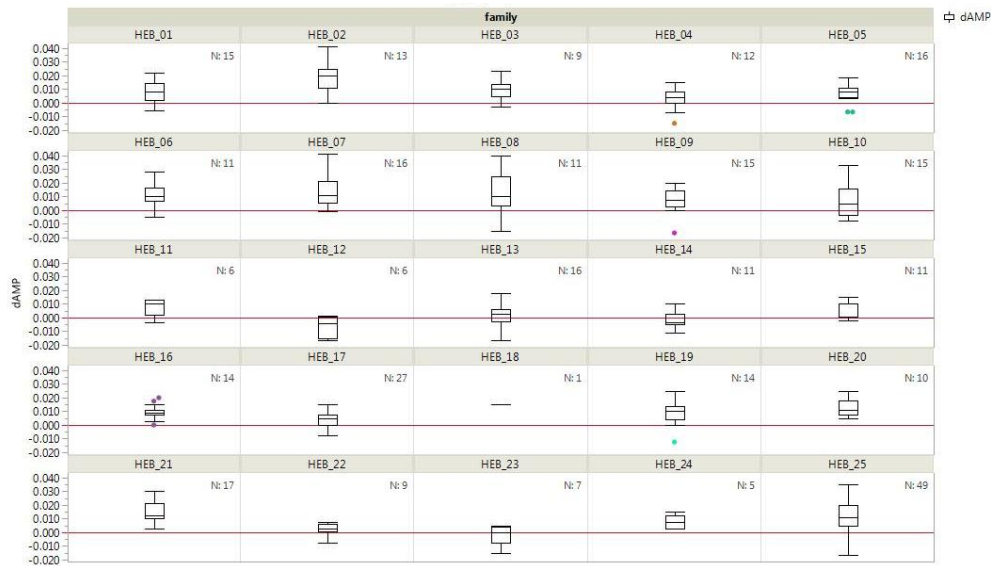

883 **Figure S2:**Differential amplitude thermal plasticity in the HEB-25 families. Box plots for  
884 dAmplitude among each of the sub-populations (each with a different *H. spontaneum* donor;  
885 (26)) of the interspecific multiparent barley population HEB-25. dPAmpplitude is the  
886 amplitude under high temperature (HT; 32°C) minus that under optimal temperature (OT;  
887 22°C). The red line represents dPAmpitude=0 that means no amplitude plasticity.

888  
889  
890  
891  
892  
893  
894  
895  
896  
897  
898  
899  
900  
901  
902  
903  
904  
905  
906

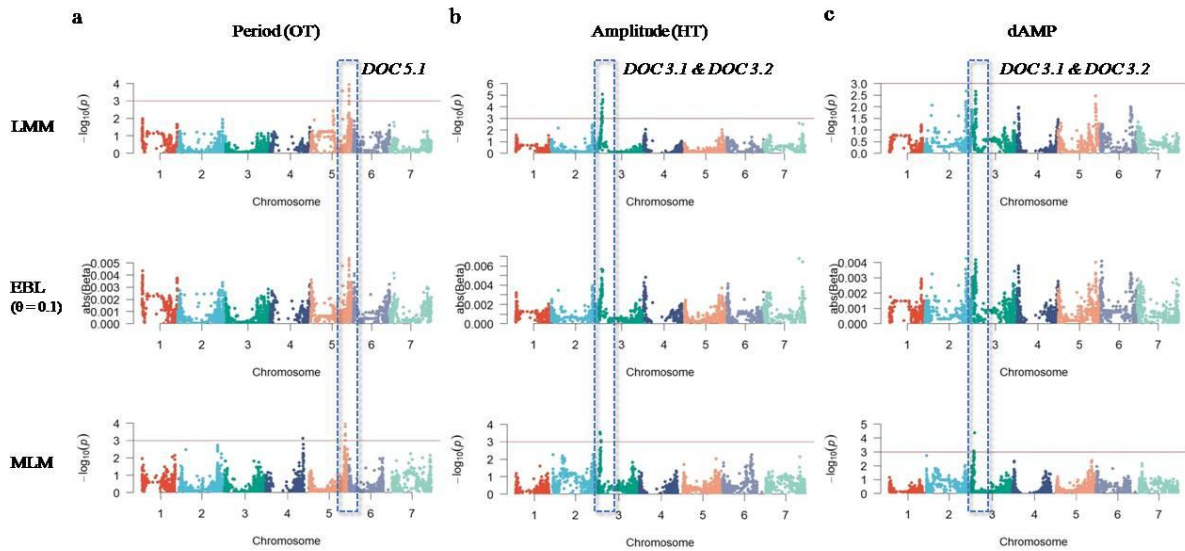

907 **Figure S3:** Significant DOCs detected in more than one method (LMM,EBL and MLM) of  
908 the GWAS analysis.(a) *DOC5.1* identified for period OT (b) *DOC3.1* and *3.2* identified for  
909 amplitude HT and (c) *DOC3.1* and *3.2* identified for delta amplitude.

910  
911  
912  
913  
914  
915  
916  
917  
918  
919  
920  
921  
922  
923  
924  
925  
926  
927  
928  
929



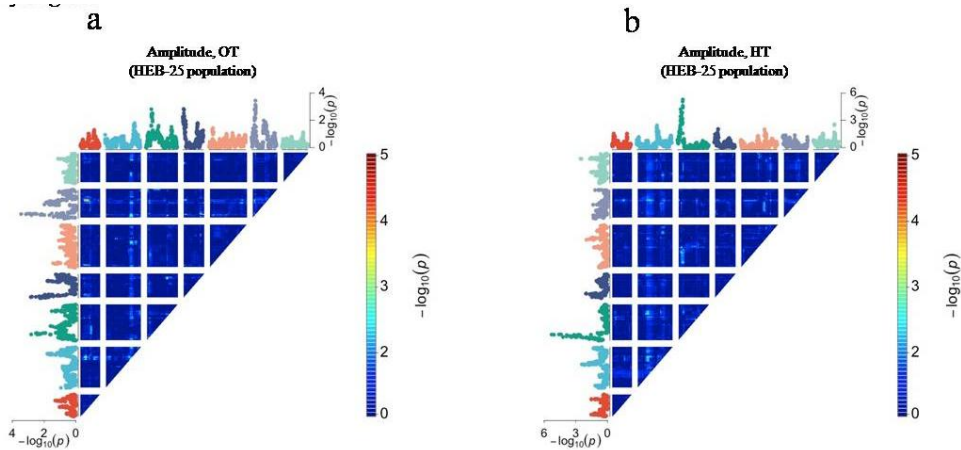

930

931 **Figure S4:**Genome-wide scan for amplitude in HEB-25 population under (a) optimal  
932 temperature (OT) and (b) high temperature (HT).Heat map for two-dimensional genome scan  
933 with a two-loci interaction model. The Manhattan plots on x- and y-axes in each panel  
934 indicate result of one-locus model genome scan. Genome scans were performed using linear  
935 mixed model that account population structure as the covariates.

936

937

938

939

940

941

942

943

944

945

946

947

948

949

950

951

952

953

954

955

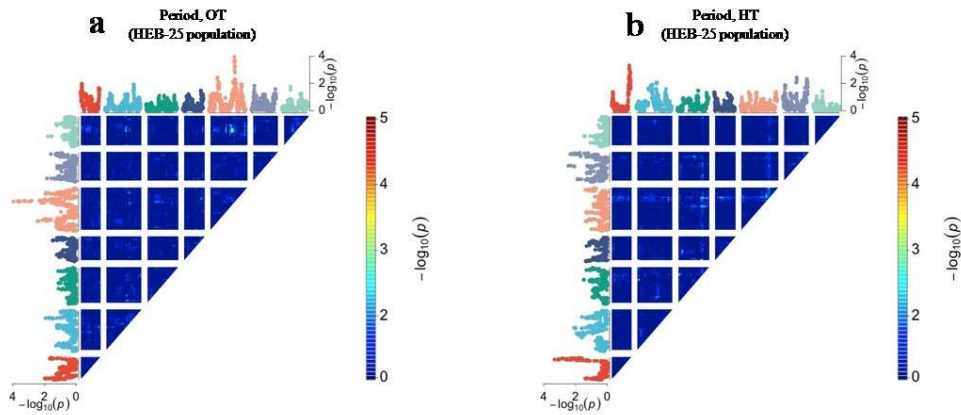

956 **Figure S5:** Genome-wide scan for period in HEB-25 population under (a) optimal  
957 temperature (OT) and (b) high temperature (HT). Heat map for two-dimensional genome scan  
958 with a two-loci interaction model. The Manhattan plots on x- and y-axes in each panel  
959 indicate result of one-locus model genome scan. Genome scans were performed using linear  
960 mixed model that account population structure as the covariates.

961  
962  
963  
964  
965  
966  
967  
968  
969  
970  
971  
972  
973  
974  
975  
976  
977  
978  
979  
980  
981

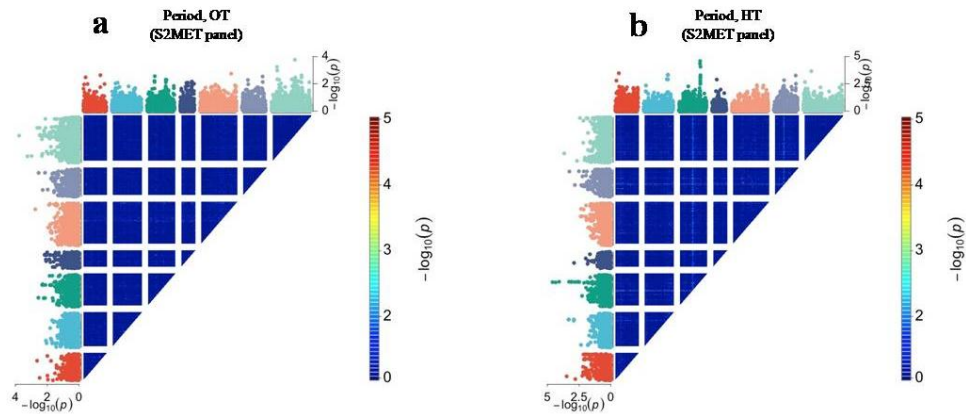

982 **Figure S6:** Genome-wide scan for amplitude in S2MET population under (a) optimal  
983 temperature (OT) and (b) high temperature (HT). Heat map for two-dimensional genome scan  
984 with a two-loci interaction model. The Manhattan plots on x- and y-axes in each panel  
985 indicate result of one-locus model genome scan. Genome scans were performed using linear  
986 mixed model that account population structure as the covariates.

987

988

989

990

991

992

993

994

995

996

997

998

999

1000

1001

1002

1003

1004

1005

1006

1007

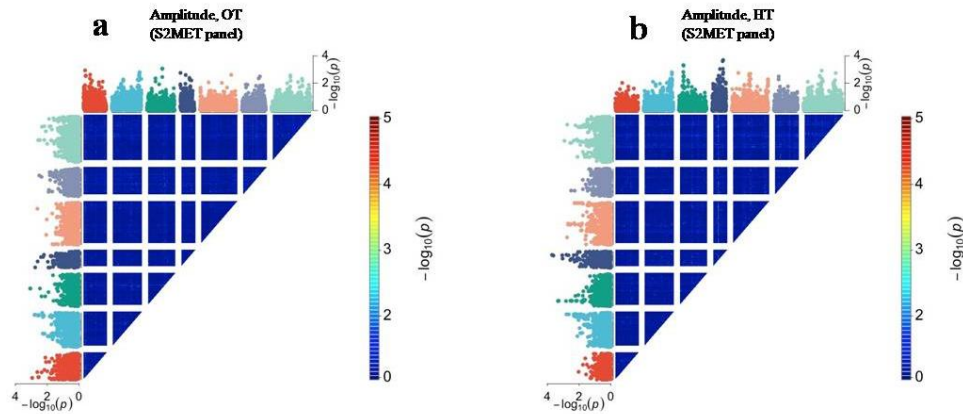

1008 **Figure S7:** Genome-wide scan for period in S2MET population under (a) optimal  
1009 temperature (OT) and (b) high temperature (HT). Heat map for two-dimensional genome scan  
1010 with a two-loci interaction model. The Manhattan plots on x- and y-axes in each panel  
1011 indicate result of one-locus model genome scan. Genome scans were performed using linear  
1012 mixed model that account population structure as the covariates.  
1013
